# Supplementary material for: Generalized mechanism model for ecosystem hysteresis
Source: Research Square preprint supplement (doi:10.21203/rs.3.rs-5799734/v1), 2025-02-07
Supplement: Supplementary file 1 [file cf79d3ecb56f0530382cd9e9.docx]

Supporting Information for

**Generalized mechanism model for ecosystem hysteresis**

Yanbin Hao1,2,3†, Xin Wang4†, Jie Liu5†, Jianqing Du2, Kai Xue6, Xiaoning Song6, Xiaoyong Cui1, Tong Zhao4, Yanfen Wang2,6*

Corresponding author: [yfwang@ucas.ac.cn](mailto:yfwang@ucas.ac.cn)

**Development of generalized mechanism model**

Ecosystems exhibit self-organized criticality, meaning that even minor disturbances can induce abrupt and significant transformations in their structure and function. This can lead to destabilization. As dissipative structures, ecosystems depend on a continuous flow of energy and matter from their surroundings. The unique structure and function of these systems are shaped by intricate interactions between biological and non-biological processes, which undergo a continuous exchange of matter and energy. The ecosystems are thus intricate entities where diverse processes work together to maintain their internal thermodynamic cycles. Similarly, in the field of combustion science, the theory of hot combustion characterizes ignition as a sudden and significant acceleration in the rate of chemical reactions that can occur either spatially or temporally. The analogy can be drawn between this concept and the hysteresis observed in ecosystems, where abrupt changes can trigger either ’catch fire’ or ‘shut down’.

Building on this analogy, we developed the hysteresis model, which describes the dynamics of combustion within a well-stirred reactor using multiple high-speed nozzles to introduce a combustible mixture symmetrically. The model captures the processes of ignition and shutdown in this system as follows:

(1)

(2)

(3)

(4)

where *V* is the reactor volume. is the mass flow rate. is the specific thermal capacity at constant pressure and are the temperature of the initial mixture and after reaction. and the mass fraction of the reactant in the initial mixture and after reaction. is the component mass change rate. is activation energy,is thecomponent density*.* isthe collision Damköhler number.

Then, we standardize the equation (1) and (2) and get nondimensional form as:

(5)

(6)

Distinct ignition and extinction states can be illustrated by plotting either the reaction temperature or the burning rate against the system's Damköhler number (Da), as depicted in Fig. S1.


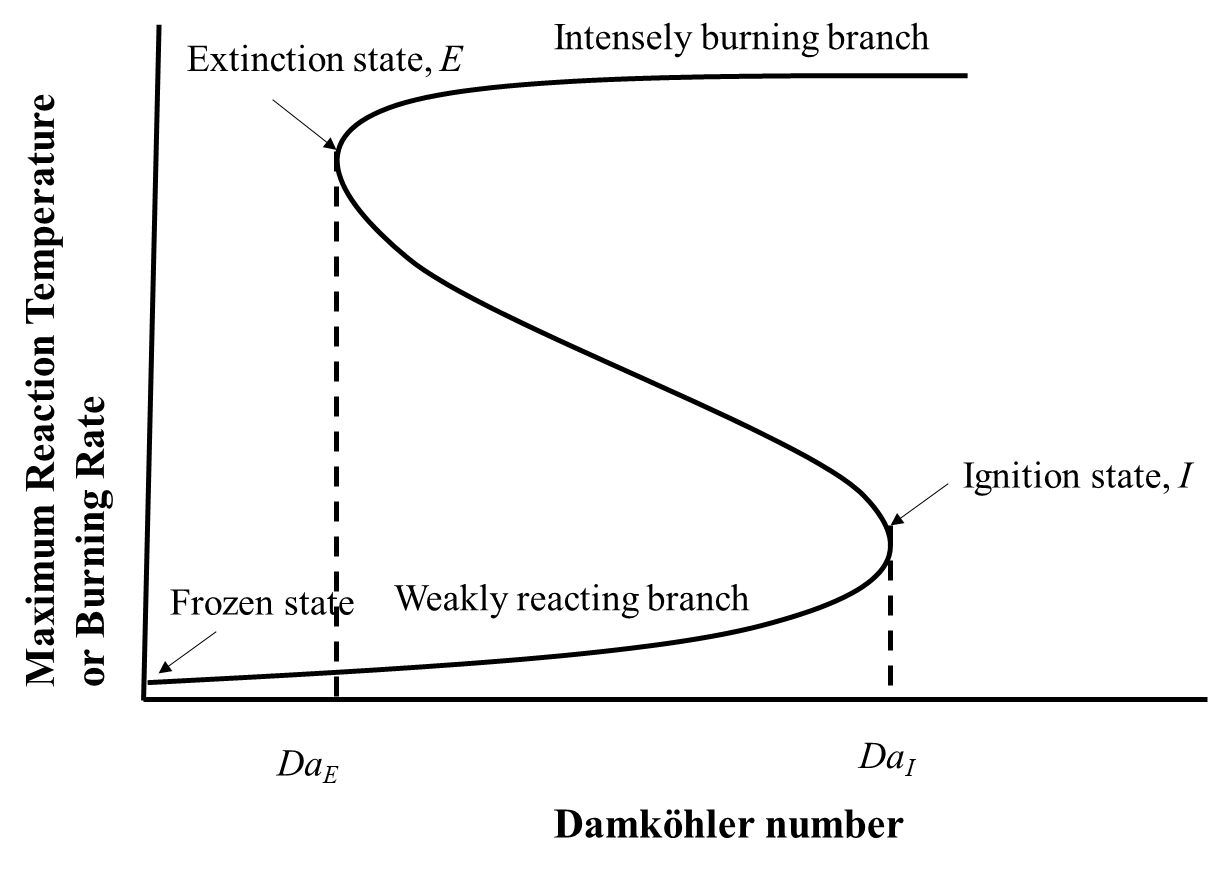


Figure S1. Representative folded S-curve with multiple solutions and distinct ignition and extinction states. For *Da* = 0, the chemically frozen flow limit is showed. By increasing *Da* along the lower branch representing the slow reaction rates, we cover all possible weakly reactive, nearly frozen, states the system can have. However, beyond the system abruptly jumps to the upper branch existing for higher Damköhler numbers and faster reaction rates. Hence, point *I* is identified as the state of ignition and is the ignition Damköhler number. If we next move along the upper branch with decreasing Da, then the system again jumps at point E back to the nearly frozen, lower branch. Therefor point *E* represents as the extinction state and is the corresponding extinction Damköhler number. There exist three possible solutions for . Within this regime, the solution on the middle branch is unstable and regarded to be physically unrealistic. The distinction between the relevant solutions on the lower and upper branches can only be made by knowing the initial conditions.

If the system reaches the stability (, and then we get the solution of stable steady of Equation (5) and (6):

(7)

We apply Equation 7 to the ecosystem by considering as the driver of the ecosystem transition and as the ecosystem state. We also modify the numerator of the first term on the right-hand side of the equation to and the denominator to , and then change in the second term to , and get the model.

**Framework of the model**

Firstly, the two steady states in a bistable system are initially modeled as distinct positive values, denoted and where . The current state of the system is denoted as the variable , satisfying the condition . When or, the attraction to *Y* each of the two stable states is codirectional, leading to a rapid transition of the ecosystem towards eitheror , depending on their proximity to *Y*. However, when the system's potential is bidirectional, indicating the possibility for the ecosystem to either transition towards an alternative stable state or return to its initial state. Our proposed model integrates a monotonically increasing function with a monotonically decreasing one, facilitating an accurate estimation of the system's inclination towards either stable state,or *,* based on the current state *.*

Secondly, we assume that the system is currently in the steady state . The positive feedback should exhibit a monotonically increasing relationship with respect to , denoted . Similarly, the negative feedback should be a monotonically decreasing function, denoted . The coexistence of two feedbacks always entails intricate interactions, necessitating the employment of multiplication by combining with .

Therefore, our model framework is：

where is driving factors, such as temperature, rainfall or nutrition contents. is the current state of system. and are two stable states of system. and are the feedback functions. It is worth noting that mathematically we have chosen and as two functions with different rates of change (e.g., exponential increase and fractional linear decrease), this is to avoid the trivial cases where the multiplication is constant or always monotonic ().

We introduce as the positive feedbackrelative to the system state , which monotonically increase. Similarly, we define as the negative feedback, which monotonically decrease. The transition of the system state is conceptualized as the outcome of a competition between these two feedbacks. We employ the product of these two functions with opposing monotonic behaviors to represent this competitive dynamic, encapsulating the essence of state shifts within our model.

**Irreversible potential and required energy for hysteresis**

In ecosystems exhibiting hysteresis, a key feature is the presence of two distinct tipping points, marking transitions between stable states. The remarkable fact is that both states are perfectly stable (and ). There are no spontaneous transitions from either state towards the other. The reason is that two stable states are not neighboring states. The transition from one to another can only take place over intermediate states which have greater driving forces (positive feedback or energy) than either of them. To put it crudely, one state must to be pushed away from its original position () to another () due to the given disturbance or energy supply. They are called the minimum disturbance force or activation energy- the force or energy needed to “push” or “activate” the transition. Call A* the disturbance force or activation energy, the excess force or energy needed in a transition in order that the transition may really occur (Fig. S2). This transition requires the system to surpass a high energy threshold, without which the state change cannot occur. Thus, the energy threshold (denoted as *A**) required for state transitions represents the energy input needed to propel the system from its initial state to a critical threshold (see the blue arrows in Fig. S2). There is a distinct possibility that the state and will undergo separation. In order to get this, it not only must have the force or energy *K* (see the red arrows in Fig. S2) which it needs in order to get separation at all but, just as it was hard for and to come convergence, so there is a kind of hill that and have to climb over to get separation again; they must possess not only sufficient force or energy to commence pulling apart, but also a certain surplus. It is like climbing a hill to get into a deep valley; they have to climb the hill coming in and they have to climb out of the valley the then over the hill coming back (Fig. S2). Thus, based on the above mention, we suppose that parameter *K* can be used to determines the performance of state variables, thereby influencing the disparity between forward and backward paths. Furthermore, we can also determine the total driving energy required for a complete hysteresis loop (Fig. S3).


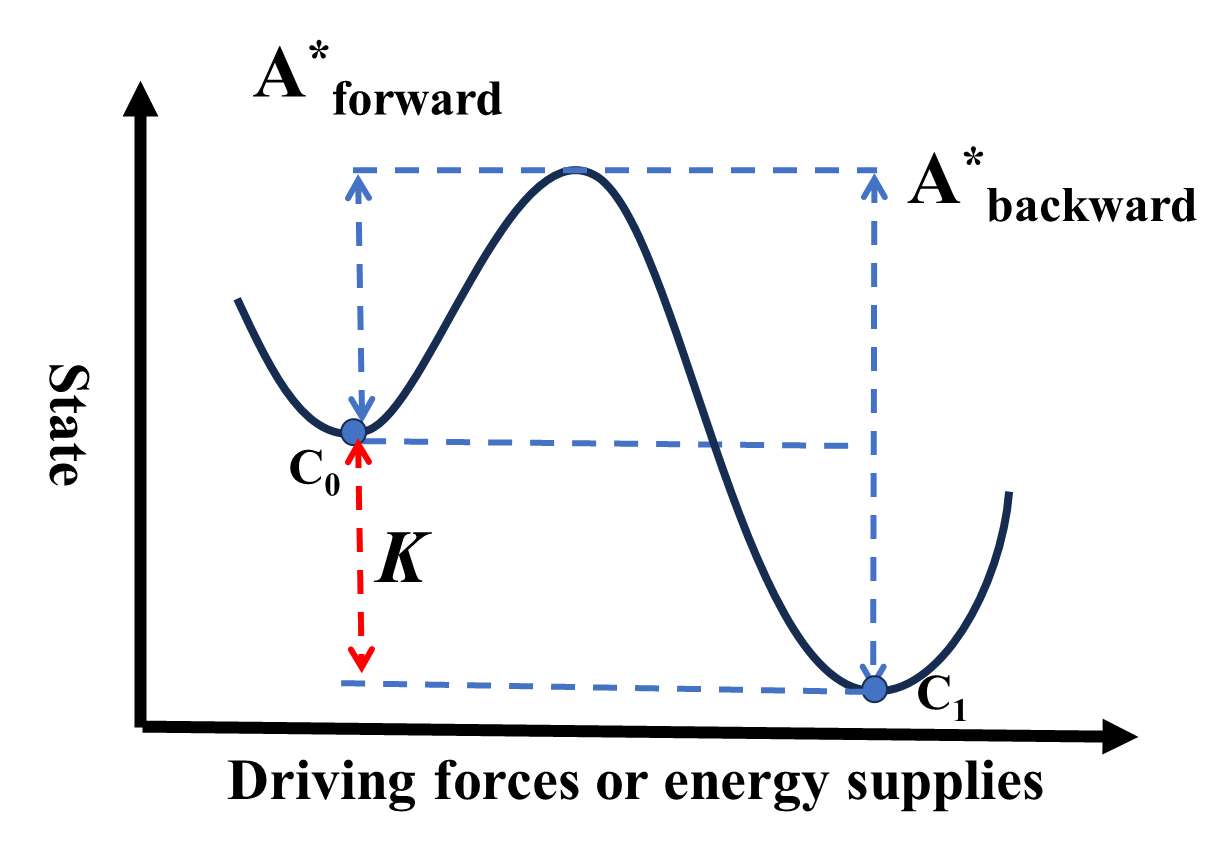


Figure S2. Thresholds of driving force or energy supply between two stable states (the initial stable state and another ). A*forward and A*backward indicate the minimum force or energies for required for transition from to and to , respectively. The red arrow is *K* representing irreversible potential.


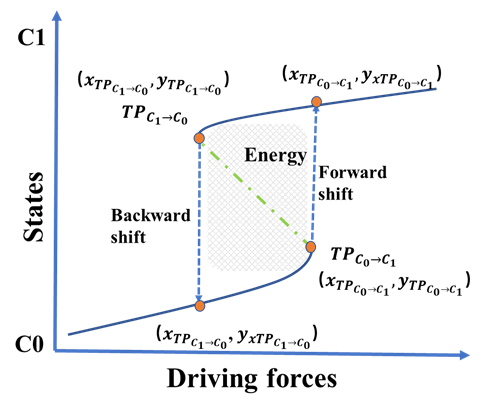


Figure S3. Schematic showing a sudden shift from the original state () to a new state () in a hysteresis system with different tipping points for forward and backward shifts. Shadow area is the required energy for driving a complete hysteresis loop. and mean the tipping points as ecosystem state transit from the original state to a new state, and return from the new state to the original state, respectively. The value in parentheses is the coordinate value corresponding to the state.

The shadowing area is calculated by next equation.

**Analysis of the model**

The expression of our model is

To find a tipping-point of ecosystem transition, let’s take the derivation of the

Let =0, and it is equivalent to the following:

Therefore, the existence of hysteresis is equivalent to the existence of two distinct roots of the above quadratic equation i.e.

So,

Let , when , tipping point is two solutions of , that is

**Standardized form for the model**

In this study, the model is expressed as:

Hysteresis can be observed across different ecosystems. For example, exhibiting hysteresis for the response of charophyte vegetation in shallow Lake Veluwe to changes in phosphorus concentration1 and state changes of oxygen in aquatic ecosystems characterized by clockwise and counterclockwise hysteresis2. If the upper and lower bounds of the selected data are used directly as the of the model without standardizing the data, it will result in a very large range of model parameter. For example, we set , and in the sample of Ref (1) and (2), respectively. The comparison of intensity of hysteresis across different ecosystems is a challenge due to significant variations in parameters. When , tends to infinity. Therefore, the value of should not be excessively small, but rather at least 1. Similarly, the value of should not be overly large. In order to compare the intensity of hysteresis in different ecosystems, we propose a preprocessing method and a standardized form for our model. We standardize the data of state to , and then do the exponential operation to adjust the range of to to get the standardized form of the model ( and ). This ensures is not excessively small and not overly large. After analyzing the data in its standardized form, the model curve is transformed back to the original range of observed data using an inverse transformation.

Table S1 Summary of tipping points of forward () and backward () paths, irreversible potential (*K*), and required energy for hysteresis loop estimated by the model during state transition with hysteresis phenomenon.

| Dataset |  |  | *K* | Required energy |
| --- | --- | --- | --- | --- |
| Individual leaves  （Lower BSA: mgmL-1） | 1.1 | 0.7 | 8.87 | 173.23 |
| Individual leaves  （medium BSA: mgmL-1） | 5.0 | 2.5 | 9.45 | 344.68 |
| Individual leaves  （higher BSA: mgmL-1） | 5.1 | 10.0 | 9.19 | 323.17 |
| Lake Veluwe  ( mgL-1) | 0.15 | 0.06 | 10.93 | 1669.67 |
| Grassland  ( mgNkg-1soil) | 0.28 | 0.15 | 9.50 | 366.00 |


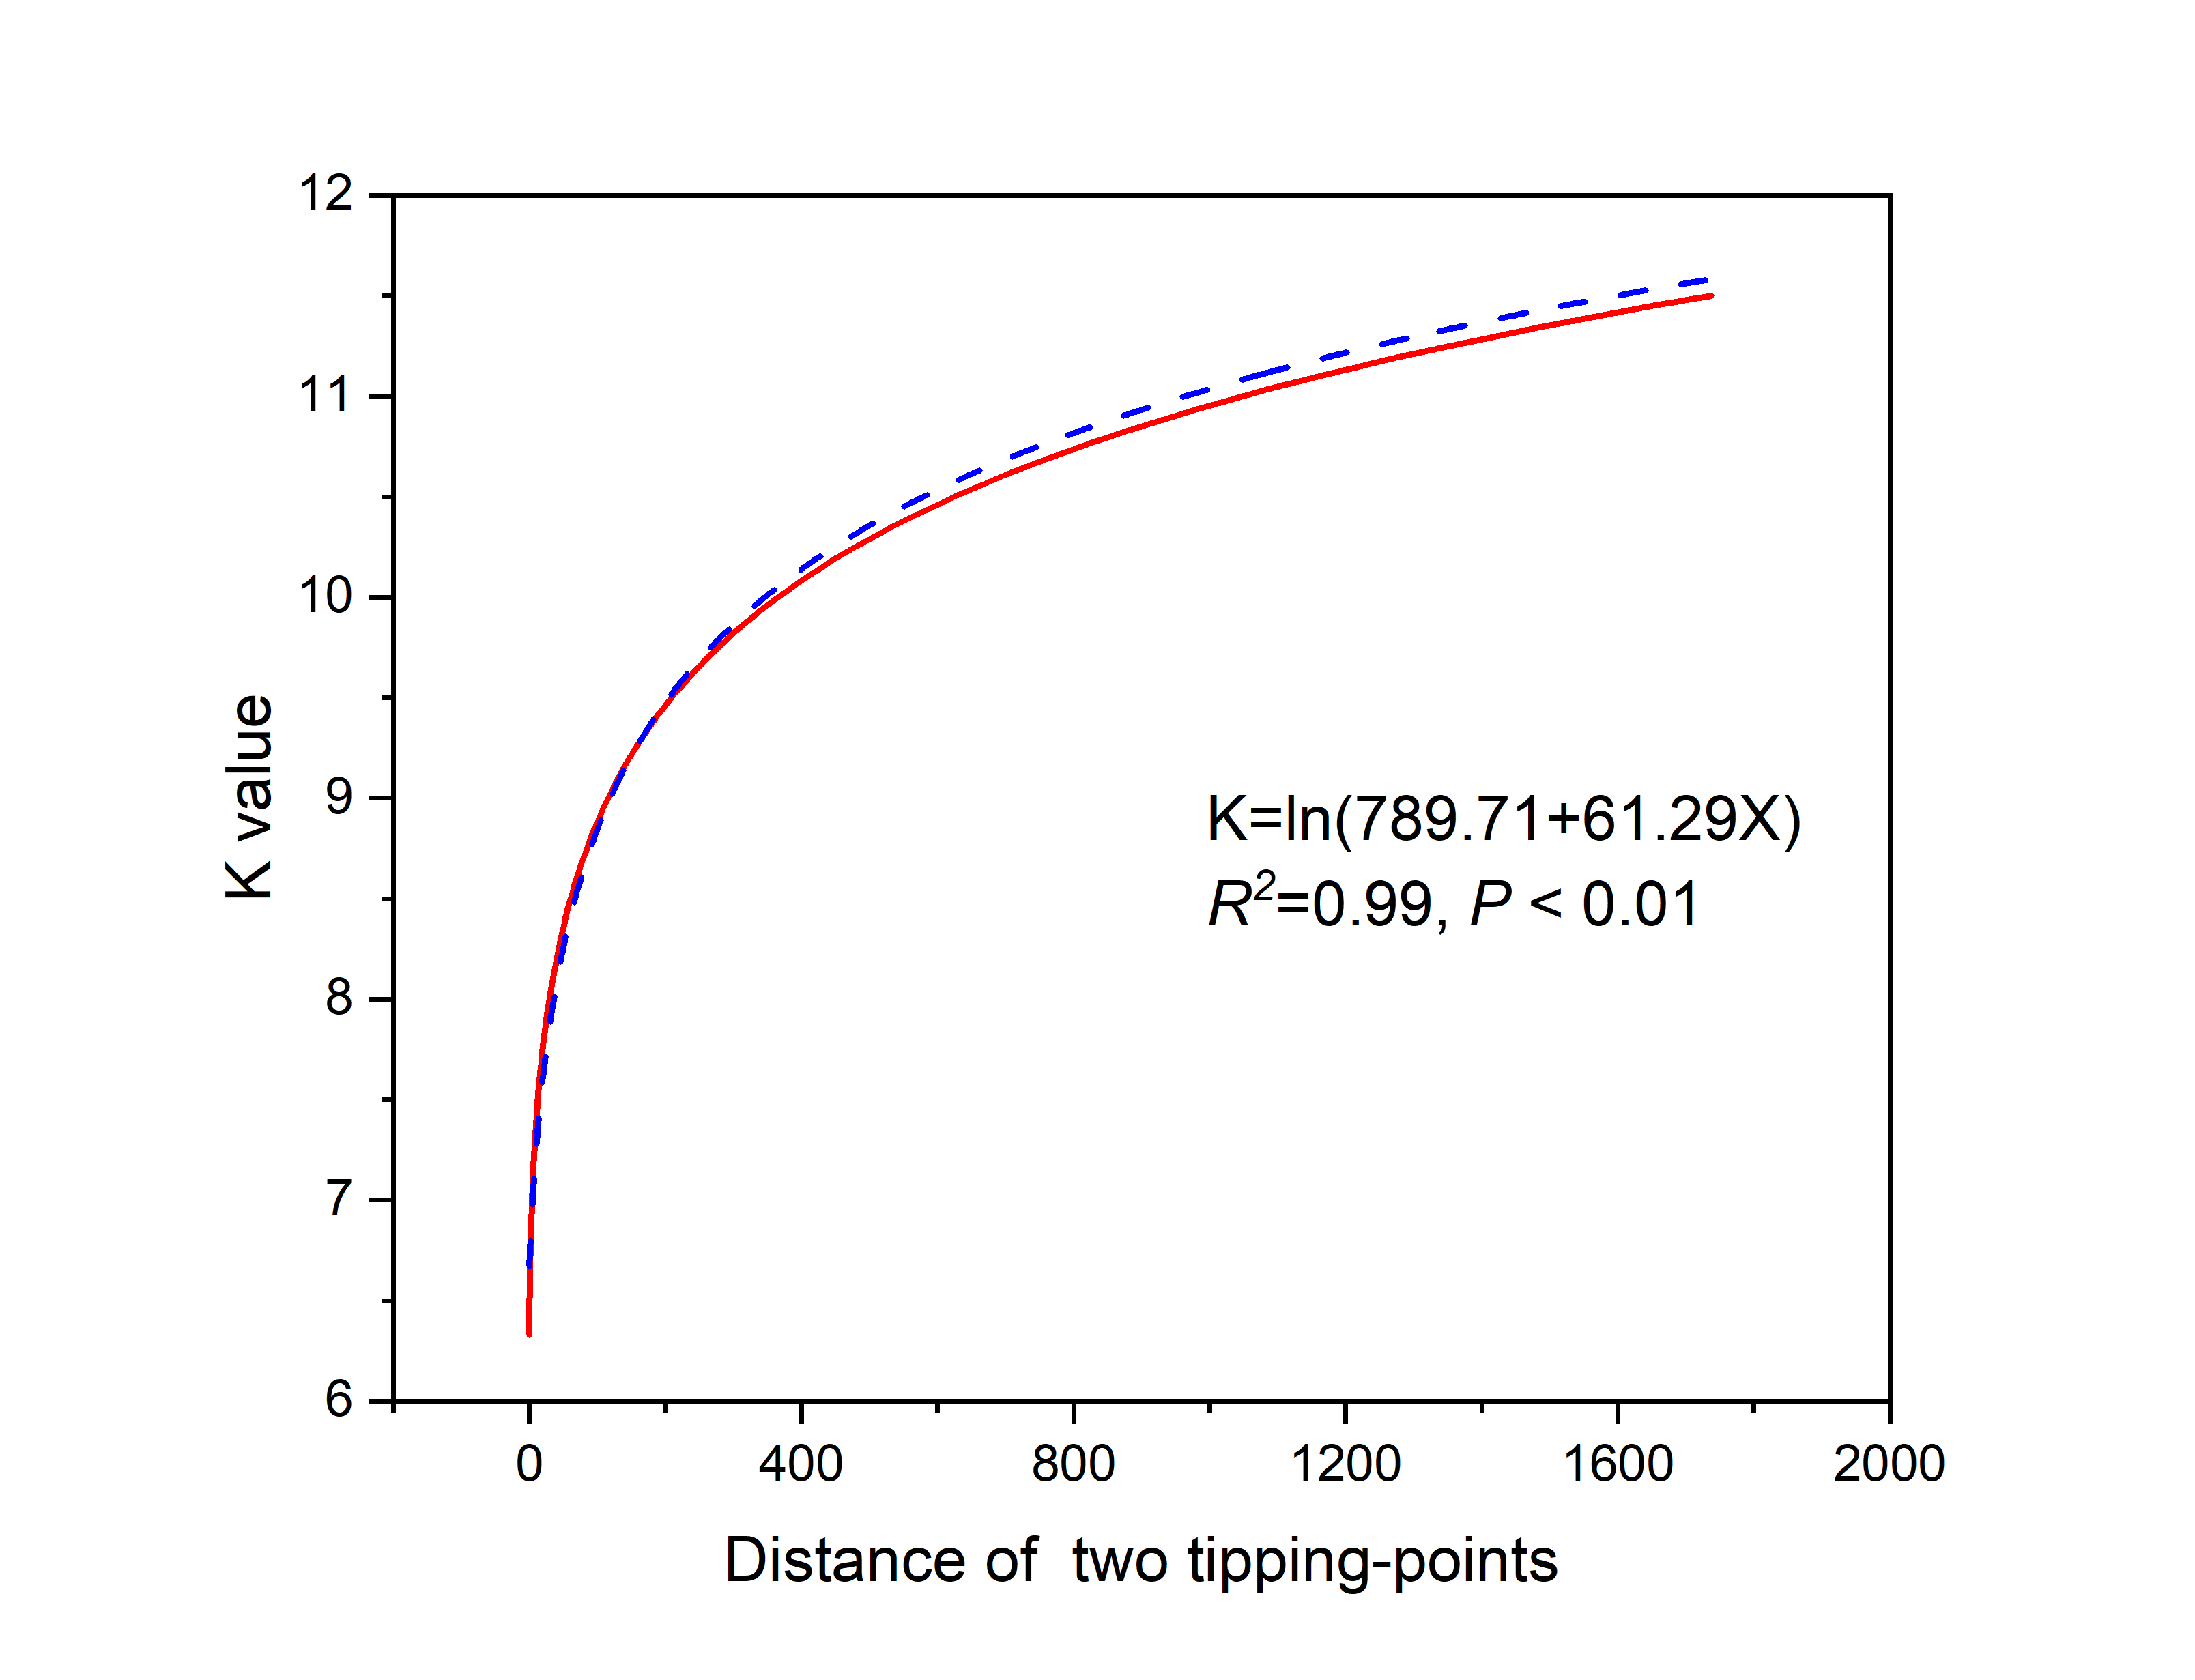


Figure S4. The relationship between the irreversible potential *K* and the distance of two tipping points.

**References**

1. Meijer，M.L. Biomanipulation in the Netherlands: 15 Years of Experience.). Wageningen University (2000).
2. Northrop AC, Avalone V, Ellison AM, Ballif BA, Gotelli NJ. Clockwise and counterclockwise hysteresis characterize state changes in the same aquatic ecosystem. Ecol Lett 24, 94-101 (2021).
